# Supplementary material
Source: PubMed Central journal article supplement (PMC4631685)
Supplement: NIHMS727570-supplement-01.pdf [file NIHMS727570-supplement-01.pdf]

**Table III:** Antibodies used in immunofluorescence labeling

| <b>Primary Antibody</b>       |                                          |                       |                   |                |
|-------------------------------|------------------------------------------|-----------------------|-------------------|----------------|
| <b>Name</b>                   | <b>Dilution</b>                          | <b>Catalog Number</b> | <b>Clonality</b>  | <b>Company</b> |
| Rabbit Anti-CD45              | 1:600                                    | ab10558               | Polyclonal        | abcam          |
| Mouse Anti-CD68               | 1:100                                    | ab955                 | Monoclonal        | abcam          |
| Rabbit Anti-CD3               | 1:50                                     | A0452                 | Polyclonal        | DAKO           |
| Rabbit Anti-CD20              | 1:50                                     | ab27093               | Polyclonal        | abcam          |
| Rabbit Anti-CD117             | 1:50                                     | ab32363               | Monoclonal        | abcam          |
| Rabbit Anti-CD86              | 1:150                                    | ab53004               | Monoclonal        | abcam          |
| Goat Anti-CD206               | 1:150                                    | sc-34577              | Polyclonal        | Santa Cruz     |
| <b>Secondary Antibody</b>     |                                          |                       |                   |                |
| <b>Name</b>                   | <b>Dilution</b>                          | <b>Catalog Number</b> | <b>Wavelength</b> | <b>Company</b> |
| Alexa 594 Donkey anti-Mouse   | 1:100                                    | A21203                | 590/617           | Invitrogen     |
| Alexa 568 Donkey anti- Rabbit | 1:50 (CD3, CD20 & CD117)<br>1:200 (CD45) | A10042                | 578/603           | Invitrogen     |
| Alexa 488 Donkey anti- Goat   | 1:250 (CD206)                            | A11055                | 488/519           | Invitrogen     |
| Alexa 647 Donkey anti- Rabbit | 1:250 (CD86)                             | A31573                | 650/668           | Invitrogen     |
